# Supplementary material
Source: Elsevier journal article supplement (https://www.sciencedirect.com/science/article/pii/S1699258X21001959)
Supplement: mmc1 [file S1699258X21001959:mmc1.pdf]

MATERIAL SUPLEMENTARIO

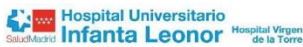

Se solicita su autorización para participar en el proyecto de investigación titulado: **ESTUDIO DE CALIDAD PERCIBIDA EN PACIENTES CON GOTA ATENDIDOS EN UNA CONSULTA DE REUMATOLOGÍA** cuyo objetivo es determinar los factores que afectan a la calidad percibida y a la satisfacción de pacientes con gota atendidos en la consulta de Reumatología. Consiste en responder anónimamente a las preguntas que le planteamos en la encuesta que encontrará debajo. Los beneficios que se esperan de este trabajo consistirán en identificar áreas de mejora en la atención que ofrecemos. La participación en este estudio es totalmente voluntaria, si usted no desea participar en el estudio, no habrá ninguna consecuencia negativa para usted. En cualquier momento puede retirarse del estudio sin que ello tenga ninguna consecuencia. La respuesta es completamente anónima, por lo que no se dispondrá de ningún dato que pueda identificarle, en cualquier caso, la información se tratará de acuerdo con la Ley Orgánica 15/1999 de Protección de datos de Carácter Personal, de 13 de diciembre (LOPD). Si tienen alguna pregunta sobre este proyecto de investigación, puede consultar en cualquier momento al Investigador: Enrique Calvo Aranda cuyo e-mail es: enrique.calvo@salud.madrid.org.

Si usted responde a las cuestiones que se le proponen, se entiende de forma tácita que ha comprendido el objetivo del presente estudio, que ha podido preguntar y aclarar las dudas que se le hubieran planteado inicialmente y que acepta participar en el estudio.

Los investigadores le agradecen su valiosa participación en el presente estudio.

Marque las respuestas que considere oportunas.

1. Su género:  
Mujer  
Hombre
2. Su edad:  
Entre 16 y 30 años  
Entre 31 y 45 años  
Entre 46 y 60 años  
Más de 60 años
3. Si usted lo recuerda, el tiempo transcurrido desde que su médico de cabecera le remitió hasta la primera visita en consulta de Reumatología, fue:  
Corto  
Razonable  
Largo
4. ¿Sabe el nombre del Reumatólogo que le atiende?  
SI  
NO
5. ¿Sabe el nombre del Enfermero que le atiende?  
SI  
NO

[DÉ LA VUELTA A LA HOJA, HAY MÁS PREGUNTAS POR DETRÁS]

6. Considera la "consulta presencial de Enfermería":  
Buena  
Regular  
Mala  
NS/NC
7. Al mes de su primera consulta, aproximadamente, el Enfermero de Reumatología, le llamará por teléfono. Considera la utilidad de la "consulta telefónica de Enfermería":  
Buena  
Regular  
Mala  
NS/NC
8. El Reumatólogo y Enfermero que le asisten, ¿le escuchan y dedican el tiempo suficiente?  
SI  
NO  
NS/NC
9. ¿Considera que le han explicado bien y de forma entendible su enfermedad y al tratamiento?  
SI  
NO  
NS/NC
10. ¿Le han aclarado bien sus dudas y preguntas?  
SI  
NO  
NS/NC
11. La disponibilidad del Reumatólogo y el Enfermero para ayudarle cuando lo necesita, la considera:  
Excelente  
Buena  
Regular  
Mala
12. Su nivel de satisfacción global por la atención recibida es:  
Muy satisfecho  
Satisfecho  
Poco satisfecho  
Nada satisfecho
13. Le agradeceríamos añadiera alguna propuesta para mejorar nuestra atención:  
-  
-  
-

Muchas gracias por rellenar esta encuesta. Su contestación es anónima y confidencial.

[Escriba aquí]
